# Supplementary material
Source: PubMed Central journal article supplement (PMC1413850)

Base Position

113500000|

114000000|

114500000|

MER121

MER121 Human  
RefSeq Genes

TBX5  
TBX5  
TBX5  
TBX5

TBX3  
TBX3

Human mRNAs from GenBank

Human mRNAs

Hu/Chimp/Mouse/Rat/Dog/Chick/Fugu/Zfish Multiz Alignments & Conservation

Conservation

chimp

dog

mouse

rat

chicken

fugu

zebrafish

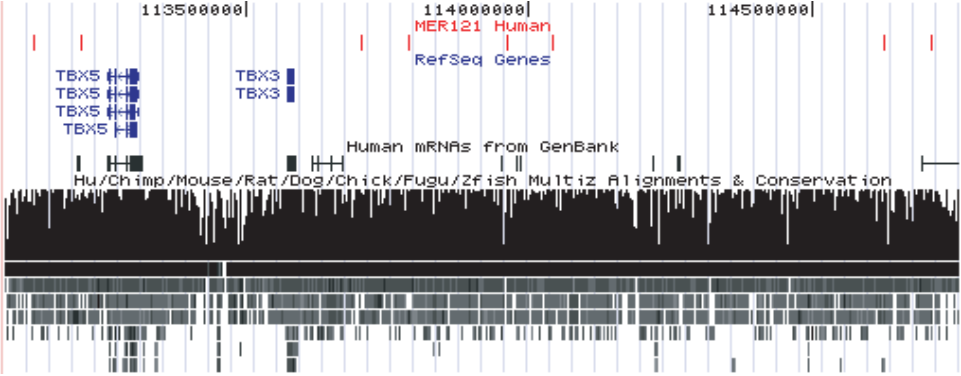

Supplement: pnas_0511238103_3.pdf [file pnas_0511238103_3.pdf]
