# Supplementary material
Source: PubMed Central journal article supplement (PMC1413850)

Base Position

128000000

128500000

MER121

MER121 Human

RefSeq Genes

ETS1

FLI1

RICS

BARX2

KCNJ1

KCNJ1

KCNJ1

KCNJ1

KCNJ1

KCNJ5

MGC35558

P53AIP1

Human mRNAs from GenBank

Human mRNAs

Hu/Ch imp/Mouse/Rat/Dog/Chick/Fugu/Zfish Multiz Alignments & Conservation

Conservation

chimp

dog

mouse

rat

chicken

fugu

zebrafish

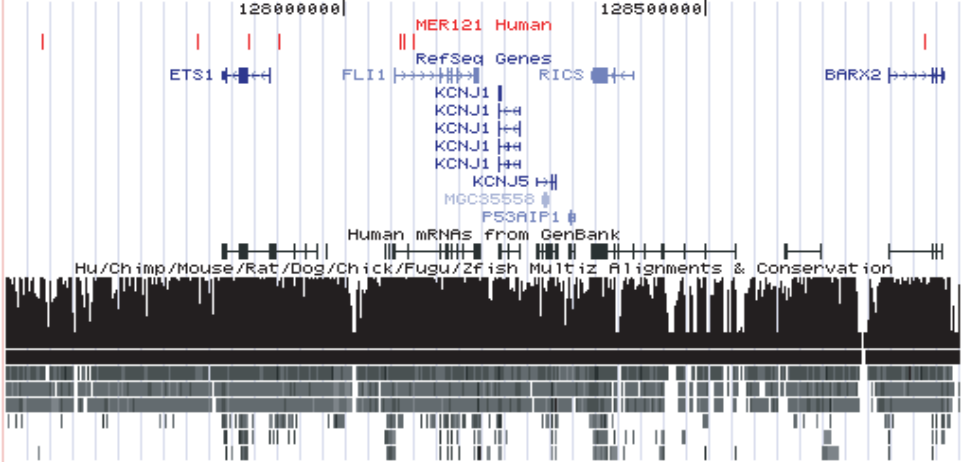

Supplement: pnas_0511238103_4.pdf [file pnas_0511238103_4.pdf]
