# Supplementary material
Source: PubMed Central journal article supplement (PMC1413850)

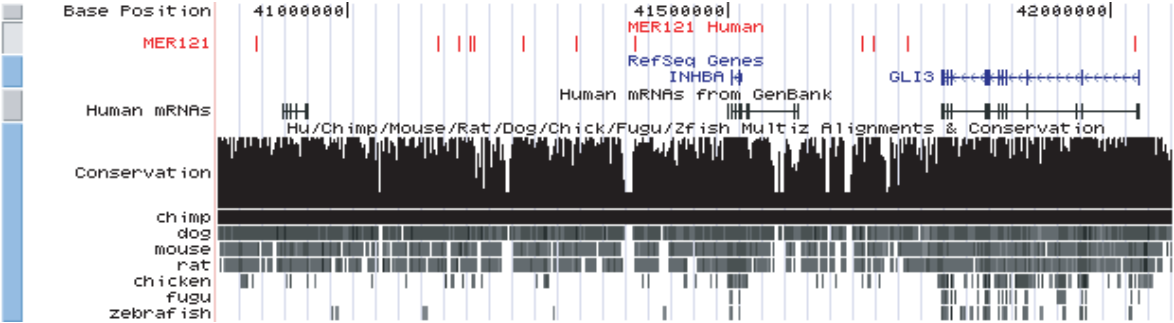

Supplement: pnas_0511238103_1.pdf [file pnas_0511238103_1.pdf]

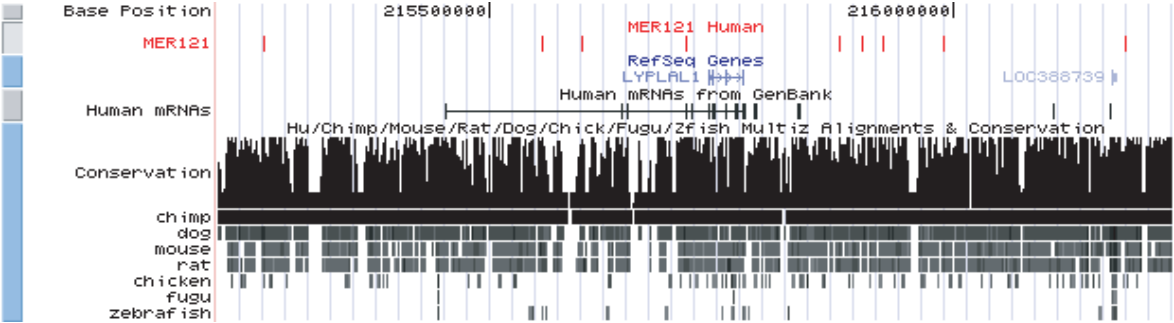

Supplement: pnas_0511238103_2.pdf [file pnas_0511238103_2.pdf]

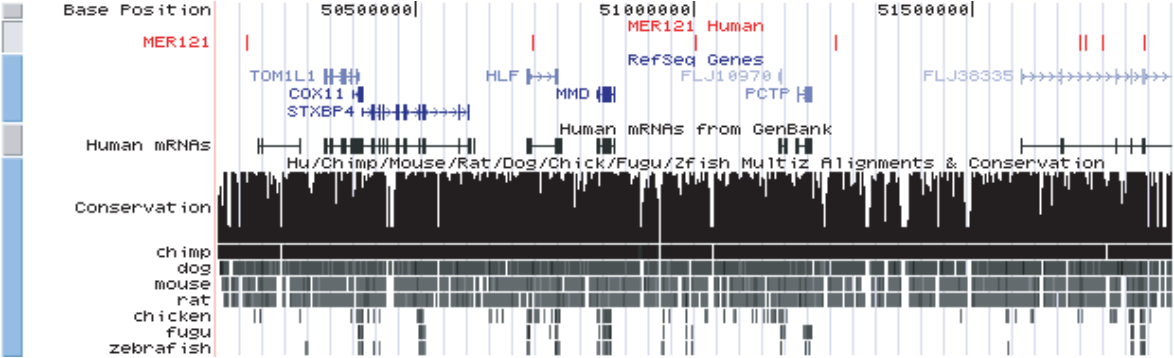

Supplement: pnas_0511238103_5.pdf [file pnas_0511238103_5.pdf]
